# Supplementary material for: Commensal Gut Bacteria Buffer the Impact of Host Genetic Variants on Drosophila Developmental Traits under Nutritional Stress
Source: PubMed Central journal article supplement — iScience. 2019 Aug 2;19:436–47. doi: 10.1016/j.isci.2019.07.048 (PMC6704380; doi:10.1016/j.isci.2019.07.048), 2019-08-02
Supplement: mmc1.pdf [file mmc1.pdf]

ISCI, Volume 19

## Supplemental Information

### **Commensal Gut Bacteria Buffer the Impact of Host Genetic Variants on *Drosophila* Developmental Traits under Nutritional Stress**

**Dali Ma, Maroun Bou-Sleiman, Pauline Joncour, Claire-Emmanuelle Indelicato, Michael Frochoux, Virginie Braman, Maria Litovchenko, Gilles Storelli, Bart Deplancke, and François Leulier**

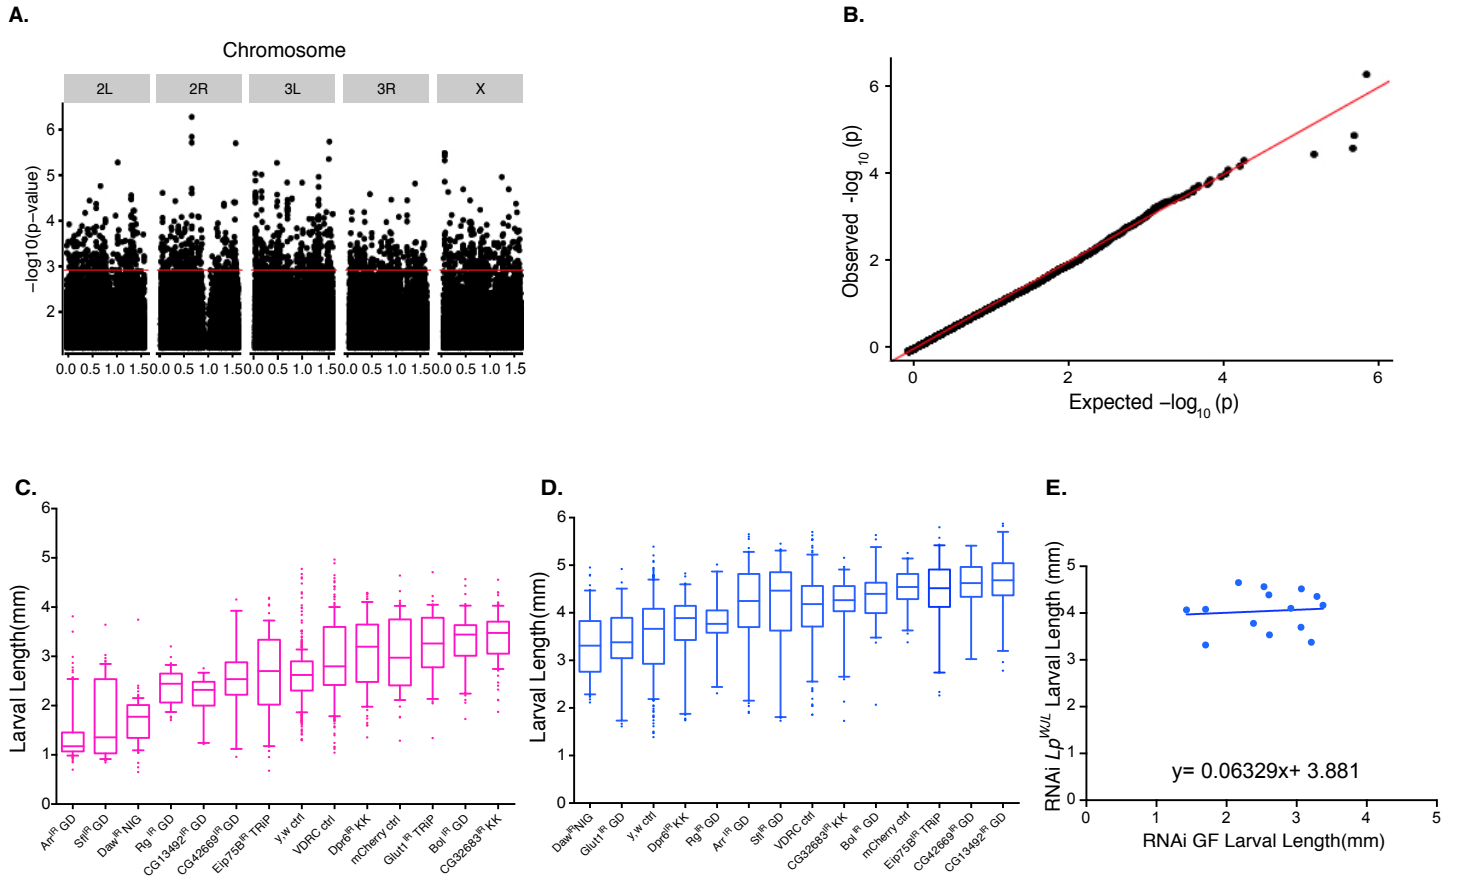

Figure S1

1 **Figure S1. GWAS discovery of the growth promotion effect by  $Lp^{WJL}$  unexpectedly unveils the**  
2 **microbial buffering capacity in different host genetic backgrounds. Related to Figure 1**

3  
4 **A).** Manhattan plot of the GWAS performed on the average larval length fold change per DGRP  
5 line. We used the DGRP2 website for the association analysis.  
6 (<http://dgrp2.gnets.ncsu.edu/>)(Huang et al., 2014; Mackay et al., 2012).

7  
8  
9 **B).** Quantile-Quantile plot of the GWAS results.

10  
11 **C). and D).** Box and whiskers plots illustrating the effect of RNAi knockdown on larval length on  
12 day 7 AEL. Each bar represents the average length from pooled 3-5 biological replicates from  
13 either condition, with 15-40 larvae in each replicate. **C:** GF. **D:**  $Lp^{WJL}$ . Three different control  
14 knockdowns were used: one control fly strain recommended by VDRC for RNAi constructs  
15 obtained from VDRC, one control strain (against mCherry) recommended by the Harvard TRiP  
16 collection, and the *y,w* strain from Bloomington. All control and RNAi strains were crossed to  
17 *y,w;; tubulin-GAL80<sup>ts</sup>, daughterless-GAL4*. "GD" refers to the VDRC RNAi GD collection. "KK"  
18 refers to the VDRC RNAi KK collection. For specific genotypes, refer to Material and Methods.

19  
20 **E).**  $Lp^{WJL}$  also buffers growth differences in the RNAi knock-down experiments for each of the  
21 candidate genes. Each data point represents the intercept of the average GF length and its  
22 corresponding mono-associated average larval length on Day 7 for each RNAi knockdown  
23 experiment. (Null hypothesis: Slope =1.  $P=0.0008$ , the null hypothesis is therefore rejected ).  
24 These data points were fitted into an unconstrained model. For specific genotypes, we refer to  
25 Table 2 and Methods. Data are represented as mean and 10-90 percentile in all panels.

26  
27

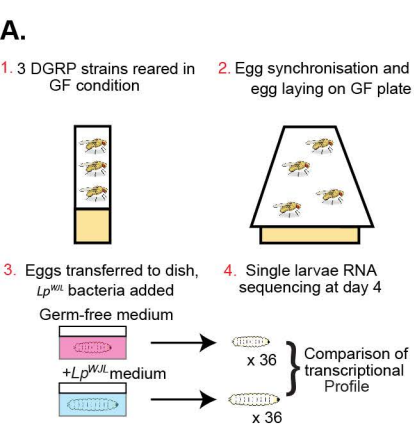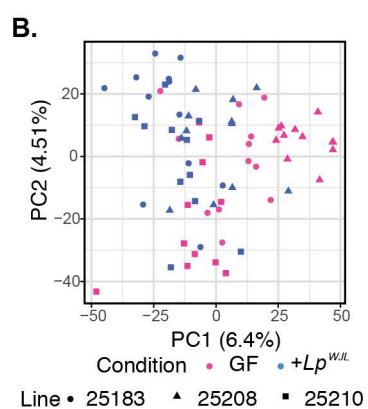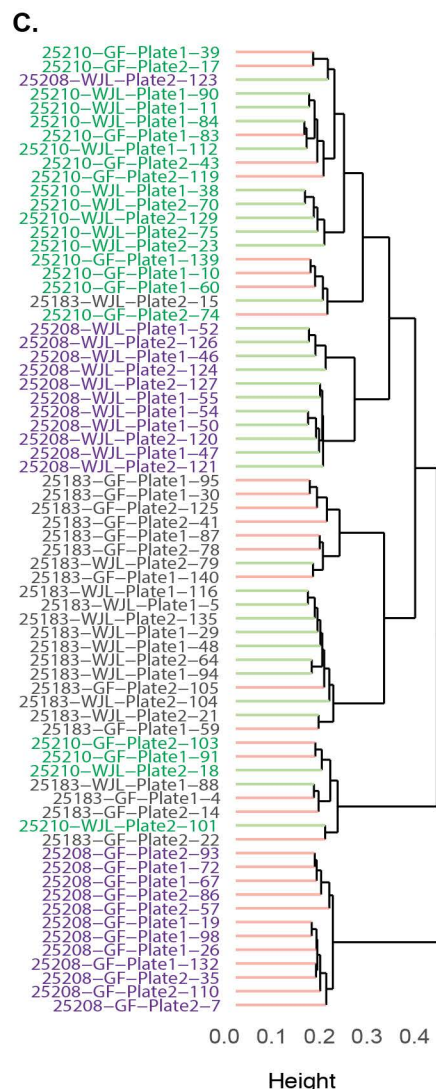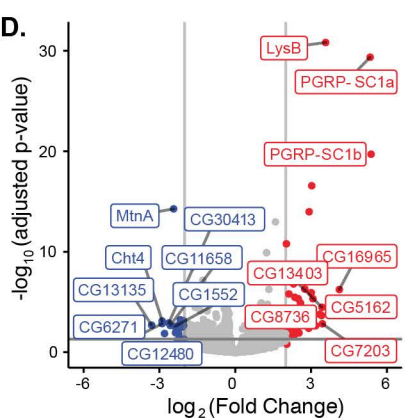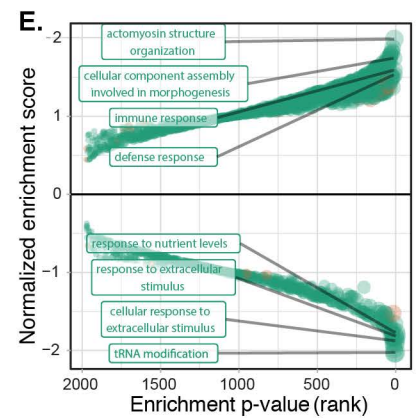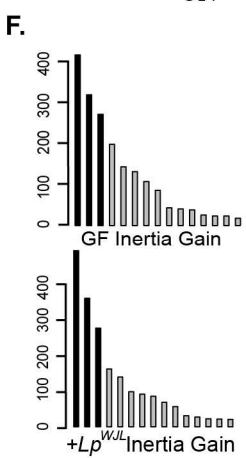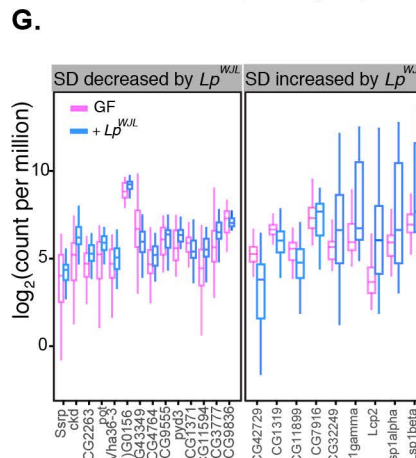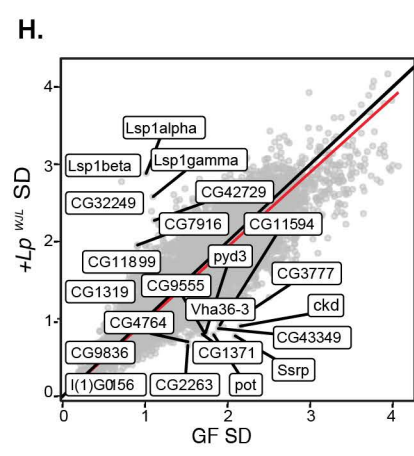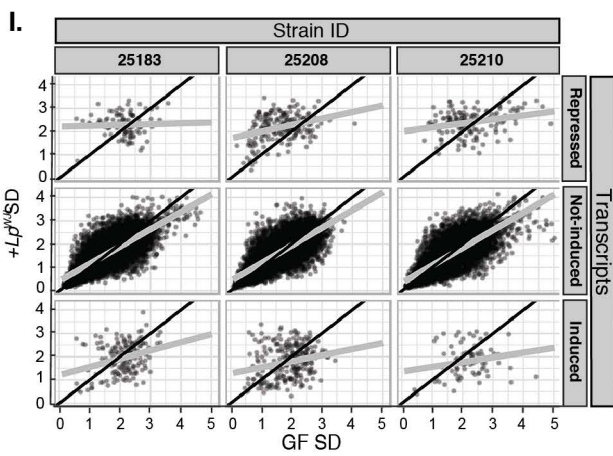

Figure S2

28 **Figure S2. The single-larva BRB-seq indicates transcriptomic buffering in developmental genes**  
29 **by  $Lp^{WJL}$ . Related to Figure 1**

30 **A).** Experimental setup to perform BRB-seq-based transcriptomics on individual larvae. Flies from  
31 three DGRP strains were reared in GF conditions. Egg-laying was synchronized and embryos  
32 were transferred to food caps: three left germ-free (1X PBS) and three inoculated with  $Lp^{WJL}$  (OD  
33 0.5 in 1x PBS). At day 4, single larvae were collected from all plates, RNA extraction and RNA  
34 sequencing were performed. 12 larvae were collected per line for each condition, totaling 72  
35 single larval transcriptomes.

36

37 **B).** Principal component plot of the corrected expression data after batch correction.

38

39 **C).** Hierarchical clustering of the transcriptomic data using the Ward's method. A batch effect of  
40 plate was corrected prior to clustering. The genotypes are color-coded (Green: 25210, violet:  
41 25208, black: 25183). The red "branches" of the cluster represent GF samples, and green ones  
42 represent mono-associated samples.

43

44 **D).** The observed effect of  $Lp^{WJL}$  mono-association on gene expression is consistent with our  
45 previous findings, thus validating our transcriptome approach on individual larvae. The horizontal  
46 grey line represents the 0.05 FDR-corrected p-value threshold. The vertical lines are the -2 and 2  
47  $\log_2$  (Fold Change) thresholds. Genes in red are significantly up-regulated, genes in blue are  
48 significantly down-regulated. Several representative genes of the top differentially regulated  
49 genes from each category are highlighted.

50

51 **E).** Gene set enrichment analysis on biological process gene ontology (GO) terms based on the  
52 effect of  $Lp^{WJL}$  mono-association. Gene sets in orange were derived from GLAD(Hu et al., 2015),  
53 whereas green gene sets were extracted from GO2MSIG(Powell, 2014).

54

55 **F).** Inertia gain of the HCPC analysis from Figure 1G and 1H. the black bars represent the "optimal"  
56 level of division of the tree suggested by FactoMineR.

57

58 **G).** Scatterplot of the standard deviation in expression level of each gene in the GF and  $Lp^{WJL}$   
59 mono-associated condition. The black line represents the theoretical slope of 1 and intercept 0.  
60 The red line is a linear fit of the points. Labelled genes show the highest relative change in their  
61 standard deviation, as determined by the absolute value of  $\log_2(SD_{Lp^{WJL}}/SD_{GF})$ .

62 **H).** Box and whiskers plots showing the expression levels of genes with high relative change in  
63 standard deviation, regardless whether the genes themselves were up- or down-regulated.

64

65 **I).** Scatterplots of standard deviations of each gene calculated by genotype. Genes were faceted  
66 by how their differential expression alters within each strain in both GF and  $Lp^{WJL}$  mono-  
67 associated conditions: repressed (top panel), non-induced (middle panel) and induced (bottom  
68 panel). The black lines represent the theoretical slope of 1 and intercepts 0, the grey lines are  
69 the linear fit to the data. Since transcripts specifically modulated by  $Lp^{WJL}$  tend to have  
70 incomparable SD, we assessed GO enrichment only on non-differentially expressed genes (see  
71 **Fig.1K**)

72

73

74

75

76

77

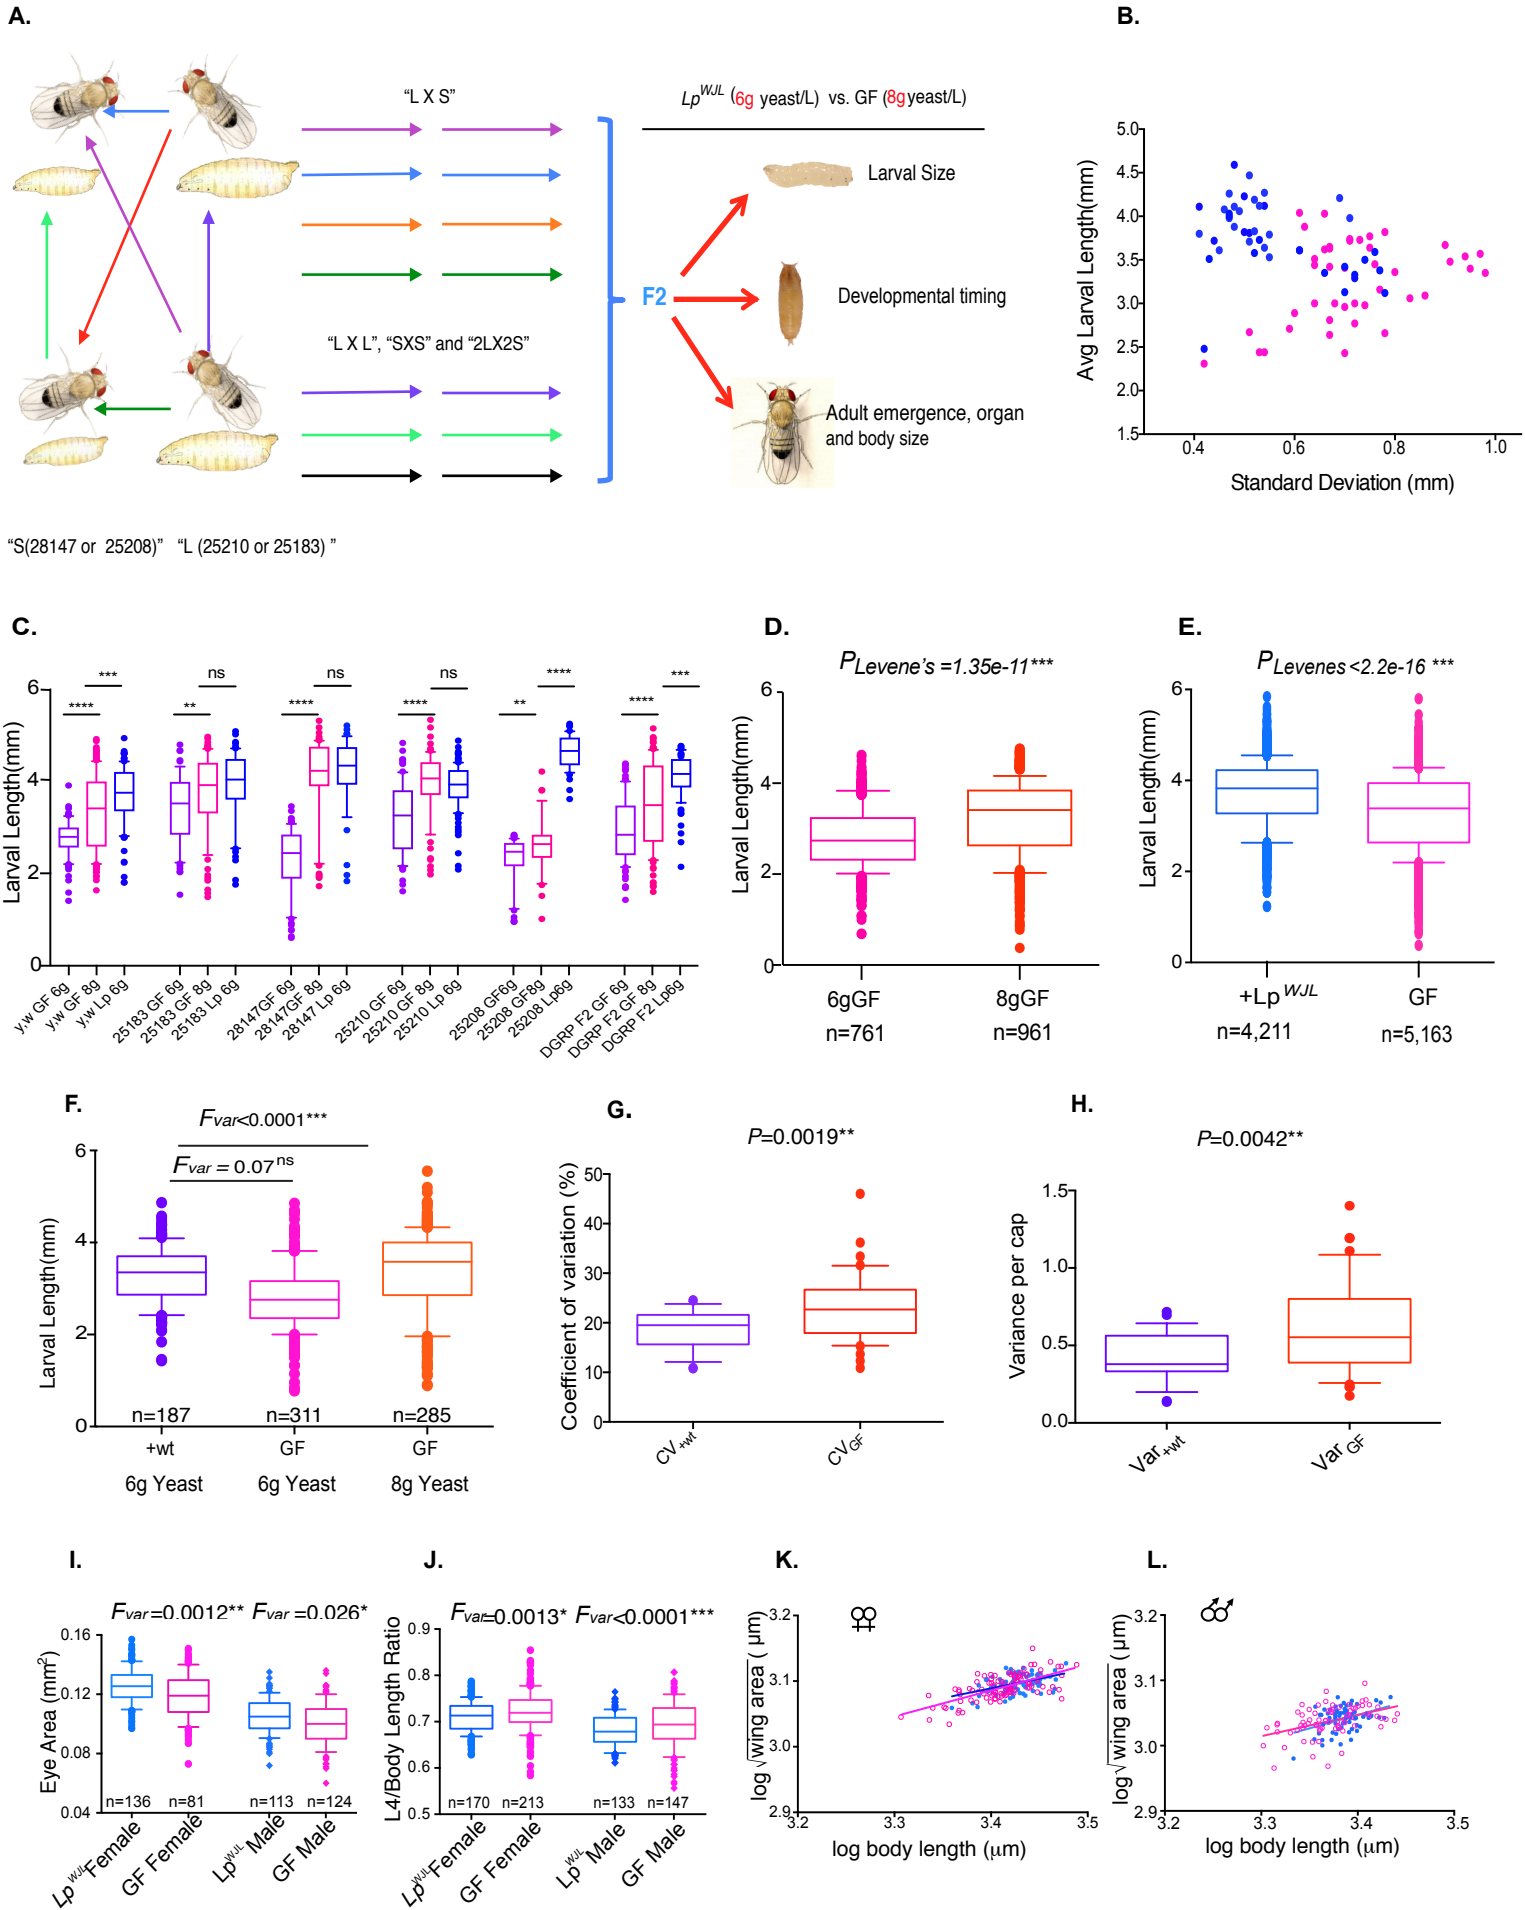

Figure S3

78 **Figure S3 In the genetically diverse DGRP F<sub>2</sub> population, *Lp<sup>WJL</sup>* reduces variation in different**  
79 **physical fitness traits. Related to Figure 2**

80 **A).** A diagram illustrating DGRP crosses to generate the F<sub>2</sub> generation for studying variation in  
81 larval size, pupariation and adult emergence. 25210 (RAL-859), 25183(RAL-335) are the lines with  
82 the "large" ("L") larvae as germ-free, and 25208(RAL-820) and 28147(RAL-158) are the lines with  
83 the "small" larvae as germ-free ("S"). Seven possible crosses are set up: 25210X25183 ("LXL"),  
84 25208X28147("SXS"), 25210X25208, 25183X25208, 25210X28147, 25183X28147 are the four  
85 "LXS" crosses, and 25183 and 25210 X 25208 and 28147 is the "2L X 2S" cross.

86  
87 **B).** A scatter plot showing how standard deviation (SD) changes as a function of larval length,  
88 and how such change differs in the DGRP F<sub>2</sub> GF (pink) and *Lp<sup>WJL</sup>* mono-associated (blue)  
89 populations (see also Figure 2a and Methods for detailed schemes). Each data point represents  
90 the intercept of an SD value and its corresponding average larval length in a particular cross.  
91 Each SD and average length was derived from larvae measurements gathered from at least 3  
92 biological replicates from either GF or *Lp<sup>WJL</sup>* mono-associated conditions. Each replicate contains  
93 10-40 larvae.

94  
95 **C).** Larval lengths of axenic flies grown on media containing 6g (purple), 8g (pink) or 6g yeast  
96 with *Lp<sup>WJL</sup>* inoculation (dark blue) on day 7 after egg-lay. Note that 2g extra yeast invariably  
97 boosts germ-free growth in different strains and genetic background. The asterisks indicate  
98 statistics differences when comparing average larval lengths between conditions.

99  
100 **D).** Larval growth and variability comparison in DGRP F<sub>2</sub> axenic larvae pooled from the parental  
101 strains (Figure S3C). For GF larvae raised on 6g/L yeast, average larval length =2.76mm,  
102 SD=0.66mm, CV=24.1%; for GF larvae raised on 8g/L yeast, average larval length =3.34mm,  
103 SD=0.85mm, CV=25.2%.

104  
105  
106 **E).** Box and Whisker graph illustrating the average length and standard deviation from pooled  
107 GF (pink) and *Lp<sup>WJL</sup>* mono-associated DGRP (blue) F<sub>2</sub> larvae, pooled from all the crosses in all  
108 three different repeats (Average GF larval length: 3.29mm; average *Lp* mono-associated larval  
109 length: 3.71mm; CV<sub>GF</sub>=24.9%, CV<sub>Lp</sub>=19.5%).

110  
111 **F).** One representative experiment showing that re-associating the field-collected flies tends to  
112 buffer the variability in body length in size-matched larvae. The purple box represents body  
113 length from wild larvae grown on media contaminated with their untreated parents' fecal matter.  
114 Average GF larval length grown on 6g/L yeast media: 2.81mm; average GF larval length grown  
115 on 8g/L yeast media: 3.36mm: average re-associated larval length ("+wt"): 3.07 mm; P= 0.338.  
116 CV<sub>GF</sub> (6g/L, pink) = 24.9%, CV<sub>GF</sub> (8g/L, orange)= 27.0%, CV<sub>wt</sub> (purple)= 18.9%.

117  
118 **G). and H).** The compiled CV values (**e.**) and variances (**f.**) derived from each low-yeast cap  
119 containing 40~50 field-collected larvae. The average CV and variance are lower in the  
120 population re-associated with its own microbes (purple) than in the GF population (orange)

121  
122 **I).** In both male (lozenge) and female (circle) adults, the variances in eye size are greater in GF F<sub>2</sub>  
123 progeny. The difference in mean eye area, for females P<0.0001\*\*\*; for males, P=0.0013\*\*.

124  
125 **J).** The length of the L4 vein in the wing is used as a proxy of the wing length. In the  
126 accumulated ratios of wing length over body length, the variances are greater in the GF flies  
127 (The difference in average L4/ body length, for females P<0.0028\*\*; for males, P=0.02\*).

128

129 **K). and L).** Scatter plots illustrating the allometric relationship between wing area and body size  
130 in female (i) and male (j) DGRP F<sub>2</sub> adults. Pink open circles: GF, blue filled circles:  $Lp^{WJL}$ . Each line  
131 represents the allometric slope of the data points shown by the same color. Either in males or  
132 females, there is no difference in allometric slope between the GF and mono-associated  
133 population. For GF females,  $Y_{GF} = 0.3963 * X + 1.738$ , 95%C.I.= 0.3117 to 0.4810; for  $Lp^{WJL}$  females,  
134  $Y_{Lp} = 0.2978 * X + 2.076$ , 95%C.I.= 0,1785 to 0,4172, P=0.203, n.s ; for GF males,  $Y_{GF} = 0.3261 * X$   
135  $+ 1.939$ , 95%C.I.= 0.1725 to 0.4796 ; for  $Lp^{WJL}$  males,  $Y_{Lp} = 0.4141 * X + 1.639$ , 95% C.I. =0.1842 to  
136 0.6439, P=0.55, ns. Data are represented as Mean and 10-90 percentile in all panels.  
137  
138



**A.**

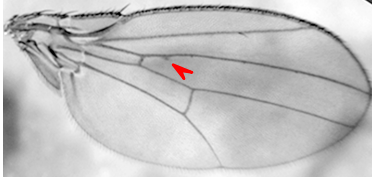

**B.**

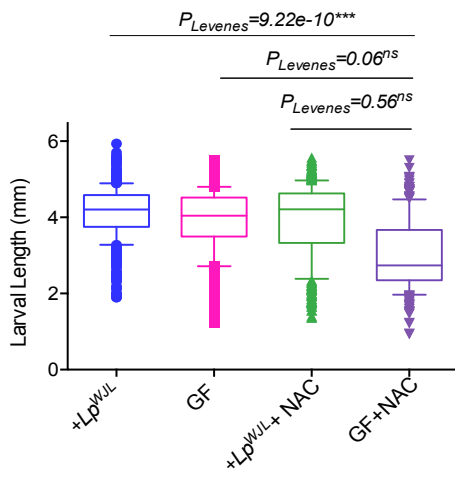

**C.**

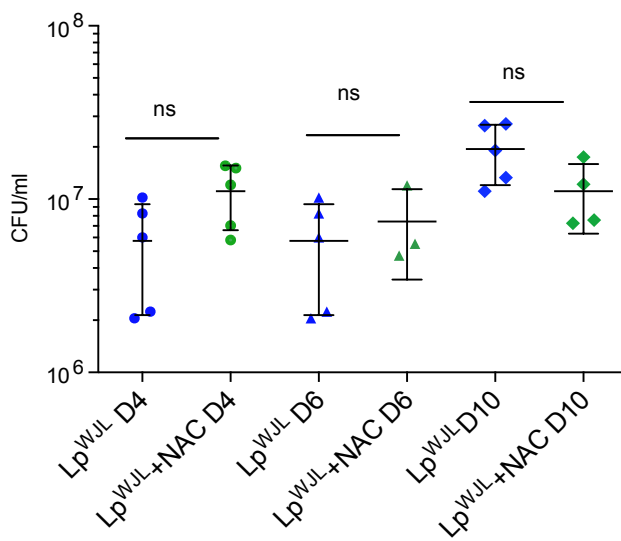

**Figure S4**

139 **Figure S4 The LpWJL buffering in developmental trait and organ patterning robustness involves**  
140 **ROS signaling. Related to Figure 3 and 4.**

141 **A.)** An image of a wing of an *Lp<sup>WJL</sup>* adult is shown, as a representation of the most visible  
142 "defect" ever observed in mono-associated adults. Red arrow points to the subtle vein tissue  
143 thickening. We included these as "defects" in the *Lp<sup>WJL</sup>* F<sub>2</sub> population in the analyses presented  
144 in Figure 3A, 3B, and 4F.

145  
146 **B.)** Germ-free larvae (light violet) that ingested NAC show comparable size variation to *Lp<sup>WJL</sup>*  
147 larvae fed on NAC (McFall-Ngai et al.) or germ-free larvae who have not been exposed to NAC  
148 (pink).

149  
150 **C.)** Bacterial niche load (NL) evolution ("Niche" is defined as the substrate with both larvae and  
151 bacteria present) during the course of larval development with *Lp<sup>WJL</sup>* with or without NAC  
152 treatment (Day 4, Day 6 and Day 10). Data are represented as mean ± SD.

153  
154  
155  
156  
157  
158  
159  
160  
161  
162  
163  
164  
165  
166  
167  
168  
169  
170  
171  
172  
173  
174  
175  
176  
177  
178  
179  
180  
181  
182  
183  
184  
185  
186  
187  
188  
189

**TableS1. Average D7 larvae length for individual DGRP lines. Related to Figure 1**

| <b>DGRP<br/>Lines</b> | <b>GF*<br/>Length(mm)</b> | <b>GF SD*(mm)</b> | <b><math>Lp^{WJL}</math> *<br/>Length(mm)</b> | <b><math>Lp^{WJL}</math><br/>SD(mm)</b> | <b><math>Lp^{WJL}/GF</math><br/>Ratio</b> |
|-----------------------|---------------------------|-------------------|-----------------------------------------------|-----------------------------------------|-------------------------------------------|
| 25174                 | 2.193                     | 0.584             | 3.637                                         | 0.895                                   | 1.658                                     |
| 25175                 | 2.693                     | 0.687             | 4.496                                         | 0.659                                   | 1.670                                     |
| 25176                 | 1.443                     | 0.536             | 3.903                                         | 0.648                                   | 2.704                                     |
| 25180                 | 2.151                     | 0.454             | 3.795                                         | 0.635                                   | 1.764                                     |
| 25181                 | 2.374                     | 0.824             | 4.224                                         | 0.946                                   | 1.779                                     |
| 25182                 | 2.108                     | 0.451             | 3.293                                         | 0.859                                   | 1.562                                     |
| 25183                 | 2.961                     | 0.657             | 4.066                                         | 0.548                                   | 1.373                                     |
| 25184                 | 1.957                     | 0.53              | 4.323                                         | 0.587                                   | 2.209                                     |
| 25185                 | 2.459                     | 0.681             | 3.93                                          | 0.722                                   | 1.598                                     |
| 25186                 | 2.278                     | 0.667             | 4.289                                         | 0.803                                   | 1.883                                     |
| 25187                 | 2.109                     | 0.479             | 3.798                                         | 0.744                                   | 1.801                                     |
| 25188                 | 2.253                     | 0.421             | 4.202                                         | 0.786                                   | 1.865                                     |
| 25189                 | 2.586                     | 0.393             | 3.448                                         | 0.876                                   | 1.333                                     |
| 25190                 | 2.292                     | 0.512             | 3.976                                         | 0.941                                   | 1.735                                     |
| 25191                 | 2.348                     | 0.428             | 3.953                                         | 0.797                                   | 1.684                                     |
| 25192                 | 2.194                     | 0.401             | 4.145                                         | 0.731                                   | 1.889                                     |
| 25193                 | 2.414                     | 0.582             | 4.05                                          | 0.782                                   | 1.678                                     |
| 25194                 | 2.506                     | 0.558             | 4.195                                         | 0.508                                   | 1.674                                     |
| 25195                 | 2.07                      | 0.402             | 3.635                                         | 0.867                                   | 1.756                                     |
| 25197                 | 1.944                     | 0.397             | 3.73                                          | 0.734                                   | 1.919                                     |
| 25198                 | 2.051                     | 0.394             | 3.936                                         | 0.673                                   | 1.919                                     |
| 25199                 | 1.514                     | 0.524             | 3.78                                          | 0.753                                   | 2.497                                     |
| 25200                 | 2.869                     | 0.752             | 4.227                                         | 0.605                                   | 1.473                                     |
| 25201                 | 2.182                     | 0.347             | 4.186                                         | 0.601                                   | 1.918                                     |
| 25202                 | 2.273                     | 0.639             | 3.85                                          | 0.792                                   | 1.694                                     |
| 25203                 | 1.541                     | 0.513             | 4.158                                         | 0.755                                   | 2.698                                     |
| 25204                 | 1.686                     | 0.678             | 4.088                                         | 0.774                                   | 2.425                                     |
| 25205                 | 2.351                     | 0.567             | 3.77                                          | 0.606                                   | 1.604                                     |
| 25206                 | 2.5                       | 0.643             | 4.173                                         | 0.619                                   | 1.669                                     |
| 25207                 | 2.028                     | 0.481             | 3.896                                         | 0.811                                   | 1.921                                     |
| 25208                 | 1.649                     | 0.443             | 4.103                                         | 0.947                                   | 2.488                                     |
| 25209                 | 2.187                     | 0.67              | 4.232                                         | 0.819                                   | 1.935                                     |
| 25210                 | 2.772                     | 0.633             | 4.03                                          | 0.466                                   | 1.454                                     |
| 25445                 | 2.01                      | 0.468             | 3.956                                         | 0.668                                   | 1.968                                     |
| 25744                 | 2.097                     | 0.34              | 4.235                                         | 0.666                                   | 2.020                                     |
| 25745                 | 2.501                     | 0.612             | 4.051                                         | 0.599                                   | 1.620                                     |
| 28132                 | 2.828                     | 0.684             | 4.485                                         | 0.534                                   | 1.586                                     |
| 28134                 | 1.854                     | 0.383             | 4.144                                         | 0.479                                   | 2.235                                     |
| 28136                 | 1.707                     | 0.415             | 4.204                                         | 0.548                                   | 2.463                                     |
| 28138                 | 1.38                      | 0.487             | 4.318                                         | 0.693                                   | 3.129                                     |
| 28142                 | 2.938                     | 0.836             | 4.487                                         | 0.489                                   | 1.527                                     |
| 28146                 | 2.077                     | 0.36              | 4.564                                         | 0.915                                   | 2.197                                     |
| 28147                 | 1.575                     | 0.552             | 4.061                                         | 0.728                                   | 2.578                                     |
| 28153                 | 2.298                     | 0.329             | 3.97                                          | 0.541                                   | 1.728                                     |
| 28154                 | 2.256                     | 0.339             | 4.365                                         | 0.482                                   | 1.935                                     |
| 28160                 | 2.51                      | 0.662             | 4.118                                         | 0.714                                   | 1.640                                     |
| 28164                 | 2.394                     | 0.448             | 4.207                                         | 0.584                                   | 1.757                                     |
| 28166                 | 2.163                     | 0.402             | 4.489                                         | 0.642                                   | 2.075                                     |
| 28173                 | 2.039                     | 0.309             | 4.122                                         | 0.697                                   | 2.022                                     |
| 28192                 | 2.141                     | 0.506             | 4.286                                         | 0.659                                   | 2.002                                     |
| 28194                 | 2.269                     | 0.565             | 4.424                                         | 0.72                                    | 1.950                                     |
| 28197                 | 2.89                      | 0.742             | 4.547                                         | 0.519                                   | 1.573                                     |
| 28208                 | 2.339                     | 0.438             | 4.14                                          | 0.705                                   | 1.767                                     |

\*GF: germ-free

\* $Lp^{WJL}$ : Lactobacillus plantarum, stain name: WJL

\*SD: standard deviation

**Table S2 . Variants associated with the growth benefits conferred by *Lactobacillus plantarum* (*Lp<sup>WJL</sup>*). Related to Figure 1.**

| Variants                  | R <sup>2</sup> | P-value   | Minor allele | Major allele | Ref* allele | MAF*   | Variant Class           | Molecular and cellular functions                                                      |
|---------------------------|----------------|-----------|--------------|--------------|-------------|--------|-------------------------|---------------------------------------------------------------------------------------|
| <b>CG13492</b>            | 46.46%         | 1.23E-06  | C            | T            | C           | 0.245  | intron                  | Unknown                                                                               |
|                           | 45.81%         | 4.526E-07 | T            | A            | T           | 0.244  |                         |                                                                                       |
|                           | 45.56%         | 1.65E-06  | G            | A            | G           | 0.25   |                         |                                                                                       |
| <b>CG32683</b>            | 39.04%         | 2.76E-06  | A            | T            | T           | 0.2453 | Intron/<br>downstream   | Unknown, arrestin-like                                                                |
|                           | 39.04%         | 2.76E-06  | A            | C            | C           | 0.2453 |                         |                                                                                       |
|                           | 29.32%         | 4.03E-06  | T            | A            | A           | 0.22   |                         |                                                                                       |
|                           | 29.07%         | 3.19E-06  | T            | G            | G           | 0.2245 |                         |                                                                                       |
|                           | 29.80%         | 1.17E-05  | CTGTTG       | C            | C           | 0.283  |                         |                                                                                       |
| <b>CG33269</b>            | 35.58%         | 8.21e-06  | G            | A            | A           | 0.14   | Intergenic              | Unknown                                                                               |
| <b>dpr6</b>               | 33.06%         | 2.94E-05  | A            | T            | T           | 0.1224 | Intron                  | Immunoglobulin-like domain; sensory perception of chemical stimulus                   |
|                           | 21.34%         | 7.77E-06  | A            | G            | G           | 0.08   |                         |                                                                                       |
| <b>Eip75B</b>             | 32.65%         | 1.22E-05  | C            | T            | C           | 0.1176 | Intron                  | Nuclear hormone receptor, ecdysone response, antimicrobial humoral response           |
| <b>rg</b>                 | 32.14%         | 9.25E-06  | G            | A            | G           | 0.4    | Intron                  | PKA-binding, cone cell differentiation, mushroom body development, olfactory learning |
| <b>sfl</b>                | 27.37%         | 9.18E-06  | G            | T            | T           | 0.4706 | Intron                  | heparan sulfate proteoglycans (HSPGs) biosynthesis/wg morphogen diffusion             |
| <b>CG42669</b>            | 26.66%         | 1.23E-05  | A            | G            | G           | 0.1373 | Intron                  | Supervillin, actin-binding                                                            |
| <b>bol</b>                | 25.07%         | 3.76E-06  | C            | T            | T           | 0.2    | 3'UTR                   | RNA binding protein. Role in meiotic entry and germline differentiation               |
| <b>CR43427, lncRNA566</b> | 23.7%          | 4,53E-06  | G            | T            | T           | 0.3269 | intergenic              | Unknown, lncRNA                                                                       |
| <b>daw</b>                | 15.1%          | 4.45E-06  | T            | C            | C           | 0.1837 | Synonymous substitution | TGF-β ligand: growth; regulation of insulin secretion                                 |
| <b>arr</b>                | 14.68%         | 1.69E-06  | G            | C            | C           | 0.1875 | intron                  | wnt protein binding/canonical wnt pathway                                             |
| <b>glut1</b>              | 11.14%         | 1.56E-06  | G            | T            | T           | 0.2245 | intron                  | General glucose/sugar transporter                                                     |

\*MAF: minor allele frequency in the 53 DGRP lines

\*Ref allele: allele info derived from BDGP (Berkeley Drosophila Genome Project)

R<sup>2</sup> reflects effect size

**Table S3. Individual larval transcriptome sample list. Related to Figure 1**

| SampleID                | Genotype | Treatment | Plate  | Individual | Well_Row | Well_Column | TotalReads | Timepoint |
|-------------------------|----------|-----------|--------|------------|----------|-------------|------------|-----------|
| GF-d4-Plate1-25183-4    | 25183    | GF        | Plate1 | 4D         |          | 1           | 3374679    | d4        |
| WJL-d4-Plate1-25183-5   | 25183    | WJL       | Plate1 | 5E         |          | 2           | 4323699    | d4        |
| GF-d4-Plate2-25208-7    | 25208    | GF        | Plate2 | 7E         |          | 9           | 1537636    | d4        |
| GF-d4-Plate1-25210-10   | 25210    | GF        | Plate1 | 10D        |          | 5           | 3969828    | d4        |
| WJL-d4-Plate1-25210-11  | 25210    | WJL       | Plate1 | 11E        |          | 6           | 5131500    | d4        |
| GF-d4-Plate2-25183-14   | 25183    | GF        | Plate2 | 14E        |          | 1           | 3307084    | d4        |
| WJL-d4-Plate2-25183-15  | 25183    | WJL       | Plate2 | 15D        |          | 2           | 2816461    | d4        |
| GF-d4-Plate2-25210-17   | 25210    | GF        | Plate2 | 17E        |          | 5           | 5063082    | d4        |
| WJL-d4-Plate2-25210-18  | 25210    | WJL       | Plate2 | 18D        |          | 6           | 4162852    | d4        |
| GF-d4-Plate1-25208-19   | 25208    | GF        | Plate1 | 19D        |          | 9           | 2459570    | d4        |
| WJL-d4-Plate2-25183-21  | 25183    | WJL       | Plate2 | 21E        |          | 2           | 2399808    | d4        |
| GF-d4-Plate2-25183-22   | 25183    | GF        | Plate2 | 22D        |          | 1           | 4448517    | d4        |
| WJL-d4-Plate2-25210-23  | 25210    | WJL       | Plate2 | 23E        |          | 6           | 4508569    | d4        |
| GF-d4-Plate1-25208-26   | 25208    | GF        | Plate1 | 26E        |          | 9           | 2085683    | d4        |
| WJL-d4-Plate1-25183-29  | 25183    | WJL       | Plate1 | 29D        |          | 2           | 1843092    | d4        |
| GF-d4-Plate1-25183-30   | 25183    | GF        | Plate1 | 30E        |          | 1           | 3678838    | d4        |
| GF-d4-Plate2-25208-35   | 25208    | GF        | Plate2 | 35D        |          | 9           | 3470625    | d4        |
| WJL-d4-Plate1-25210-38  | 25210    | WJL       | Plate1 | 38D        |          | 6           | 3828526    | d4        |
| GF-d4-Plate1-25210-39   | 25210    | GF        | Plate1 | 39E        |          | 5           | 4247231    | d4        |
| GF-d4-Plate2-25183-41   | 25183    | GF        | Plate2 | 41F        |          | 1           | 1761823    | d4        |
| GF-d4-Plate2-25210-43   | 25210    | GF        | Plate2 | 43F        |          | 5           | 3169382    | d4        |
| WJL-d4-Plate1-25208-46  | 25208    | WJL       | Plate1 | 46C        |          | 10          | 2892171    | d4        |
| WJL-d4-Plate1-25208-47  | 25208    | WJL       | Plate1 | 47B        |          | 10          | 3387926    | d4        |
| WJL-d4-Plate1-25183-48  | 25183    | WJL       | Plate1 | 48F        |          | 2           | 3595814    | d4        |
| WJL-d4-Plate1-25208-50  | 25208    | WJL       | Plate1 | 50A        |          | 10          | 5708076    | d4        |
| WJL-d4-Plate1-25208-52  | 25208    | WJL       | Plate1 | 52E        |          | 10          | 3305828    | d4        |
| WJL-d4-Plate1-25208-54  | 25208    | WJL       | Plate1 | 54D        |          | 10          | 2980174    | d4        |
| WJL-d4-Plate1-25208-55  | 25208    | WJL       | Plate1 | 55F        |          | 10          | 2648893    | d4        |
| GF-d4-Plate2-25208-57   | 25208    | GF        | Plate2 | 57F        |          | 9           | 1789505    | d4        |
| GF-d4-Plate1-25183-59   | 25183    | GF        | Plate1 | 59F        |          | 1           | 3461758    | d4        |
| GF-d4-Plate1-25210-60   | 25210    | GF        | Plate1 | 60F        |          | 5           | 3205718    | d4        |
| WJL-d4-Plate2-25183-64  | 25183    | WJL       | Plate2 | 64F        |          | 2           | 3165014    | d4        |
| GF-d4-Plate1-25208-67   | 25208    | GF        | Plate1 | 67F        |          | 9           | 1551867    | d4        |
| WJL-d4-Plate2-25210-70  | 25210    | WJL       | Plate2 | 70F        |          | 6           | 8073425    | d4        |
| GF-d4-Plate1-25208-72   | 25208    | GF        | Plate1 | 72C        |          | 9           | 2668655    | d4        |
| GF-d4-Plate2-25210-74   | 25210    | GF        | Plate2 | 74B        |          | 5           | 947737     | d4        |
| WJL-d4-Plate2-25210-75  | 25210    | WJL       | Plate2 | 75C        |          | 6           | 4812520    | d4        |
| GF-d4-Plate2-25183-78   | 25183    | GF        | Plate2 | 78B        |          | 1           | 2869820    | d4        |
| WJL-d4-Plate2-25183-79  | 25183    | WJL       | Plate2 | 79C        |          | 2           | 4934533    | d4        |
| GF-d4-Plate1-25210-83   | 25210    | GF        | Plate1 | 83C        |          | 5           | 4113175    | d4        |
| WJL-d4-Plate1-25210-84  | 25210    | WJL       | Plate1 | 84B        |          | 6           | 4684552    | d4        |
| GF-d4-Plate2-25208-86   | 25208    | GF        | Plate2 | 86B        |          | 9           | 3324070    | d4        |
| GF-d4-Plate1-25183-87   | 25183    | GF        | Plate1 | 87C        |          | 1           | 3728767    | d4        |
| WJL-d4-Plate1-25183-88  | 25183    | WJL       | Plate1 | 88B        |          | 2           | 4564509    | d4        |
| WJL-d4-Plate1-25210-90  | 25210    | WJL       | Plate1 | 90C        |          | 6           | 3714293    | d4        |
| GF-d4-Plate1-25210-91   | 25210    | GF        | Plate1 | 91B        |          | 5           | 4179985    | d4        |
| GF-d4-Plate2-25208-93   | 25208    | GF        | Plate2 | 93C        |          | 9           | 3569201    | d4        |
| WJL-d4-Plate1-25183-94  | 25183    | WJL       | Plate1 | 94C        |          | 2           | 4200621    | d4        |
| GF-d4-Plate1-25183-95   | 25183    | GF        | Plate1 | 95B        |          | 1           | 4373035    | d4        |
| GF-d4-Plate1-25208-98   | 25208    | GF        | Plate1 | 98B        |          | 9           | 3652231    | d4        |
| WJL-d4-Plate2-25210-101 | 25210    | WJL       | Plate2 | 101B       |          | 6           | 4457721    | d4        |
| GF-d4-Plate2-25210-103  | 25210    | GF        | Plate2 | 103C       |          | 5           | 3903565    | d4        |
| WJL-d4-Plate2-25183-104 | 25183    | WJL       | Plate2 | 104B       |          | 2           | 982388     | d4        |
| GF-d4-Plate2-25183-105  | 25183    | GF        | Plate2 | 105C       |          | 1           | 3094592    | d4        |
| GF-d4-Plate2-25208-110  | 25208    | GF        | Plate2 | 110A       |          | 9           | 1967561    | d4        |
| WJL-d4-Plate1-25210-112 | 25210    | WJL       | Plate1 | 112A       |          | 6           | 3472086    | d4        |
| WJL-d4-Plate1-25183-116 | 25183    | WJL       | Plate1 | 116A       |          | 2           | 4865847    | d4        |
| GF-d4-Plate2-25210-119  | 25210    | GF        | Plate2 | 119A       |          | 5           | 3773438    | d4        |
| WJL-d4-Plate2-25208-120 | 25208    | WJL       | Plate2 | 120F       |          | 10          | 2018688    | d4        |
| WJL-d4-Plate2-25208-121 | 25208    | WJL       | Plate2 | 121D       |          | 10          | 2595705    | d4        |
| WJL-d4-Plate2-25208-123 | 25208    | WJL       | Plate2 | 123E       |          | 10          | 1841390    | d4        |
| WJL-d4-Plate2-25208-124 | 25208    | WJL       | Plate2 | 124A       |          | 10          | 3326544    | d4        |
| GF-d4-Plate2-25183-125  | 25183    | GF        | Plate2 | 125A       |          | 1           | 1822797    | d4        |
| WJL-d4-Plate2-25208-126 | 25208    | WJL       | Plate2 | 126B       |          | 10          | 3831425    | d4        |
| WJL-d4-Plate2-25208-127 | 25208    | WJL       | Plate2 | 127C       |          | 10          | 3109485    | d4        |
| WJL-d4-Plate2-25210-129 | 25210    | WJL       | Plate2 | 129A       |          | 6           | 1737064    | d4        |
| GF-d4-Plate1-25208-132  | 25208    | GF        | Plate1 | 132A       |          | 9           | 3284211    | d4        |
| WJL-d4-Plate2-25183-135 | 25183    | WJL       | Plate2 | 135A       |          | 2           | 4603643    | d4        |
| GF-d4-Plate1-25210-139  | 25210    | GF        | Plate1 | 139A       |          | 5           | 2749602    | d4        |
| GF-d4-Plate1-25183-140  | 25183    | GF        | Plate1 | 140A       |          | 1           | 2722703    | d4        |

## 190 Transparent Methods

### 191 •Fly stocks and genetic crosses

192 Drosophila were kept at 25°C in a Panasonic Mir425 incubator with 12/12 hrs dark/light cycles.  
193 Routine stocks were kept on standard laboratory diet (see below “media preparation and NAC  
194 treatment”) The 53 DGRP lines were obtained from Bloomington Drosophila Stock Center.

195  
196 Field-collected flies were trapped with rotten tomatoes in a garden in Solaize (France) and  
197 reared on a medium without chemical preservatives to minimize the modification to their gut  
198 microbiota(Tefit et al., 2017). One liter of media contains 15g inactivated yeast, 25g sucrose  
199 (Sigma Aldrich, ref. #84100), 80g cornmeal and 10g agar.

200  
201 To generate DGRP F<sub>2</sub>s, four DGRP lines were selected for setting up seven different crosses:  
202 25210 (RAL-859), 25183(RAL-335) are the lines with “large” larvae as germ-free, and 25208(RAL-  
203 820) and 28147(RAL-158) are the line with “small” larvae as germ-free (see figure legend Figure  
204 S3a).

205  
206 All RNAi lines were crossed to the driver line *y,w;; tubulin-GAL80<sup>ts</sup>, daughterless-GAL4*. To  
207 minimize lethality, we dampend the GAL4 strength by leaving the genetic crosses at 25°C. The  
208 following fly strains were used: *y,w, UAS-dpr-6-IR*(P{KK112634}VIE-260B), *UAS-CG13492-IR*,  
209 (*w<sup>1118</sup>;P{GD14825}v29390*), *UAS-daw-IR*(NIG #16987R-1), *UAS-sfl-IR* (*w<sup>1118</sup>; P{GD2336}v5070*),  
210 *UAS-arr-IR* (*w<sup>1118</sup>; P{GD2617}v4818*), *UAS-rg-IR*(*w<sup>1118</sup>; P{GD8235}v17407*), *UAS-bol-IR*(*w<sup>1118</sup>;*  
211 *{GD10525}v21536*), *UAS-glut1-IR*(*y<sup>1</sup> v<sup>1</sup>; P{TRiP.JF03060}attP2*, Bloomington 28645), *UAS-*  
212 *CG32683-IR* (P{KK112515}VIE-260B), *UAS-CG42669-IR*(*w<sup>1118</sup>;P{GD7292}v18081*), *UAS-Eip75B-IR*  
213 (*w<sup>1118</sup>; P{GD1434}v44851*), *UAS-mCherry-IR* (*y<sup>1</sup> v<sup>1</sup>; P{CaryP}attP2*), VDRC GD control (VDRC  
214 ID60000).

215

### 216 •GWAS and data computing of heritability indice

217 To calculate heritability, we estimated variance components using a random effects model using  
218 the lme4 R package(Bates, 2015). To infer the differences in heritability between GF and *Lp<sup>WJL</sup>*-  
219 monoassociated conditions, we chose to use a bootstrap approach as in  
220 (<https://github.com/famuvie/breedR/wiki/Heritability>). Strains and experiment dates were treated  
221 as random effects, and the heritability was calculated as  $VA/(VA+VD+VR)$ , where VA is the  
222 additive genetic variance, and is equal to twice the Strain variance, VD is the experiment date  
223 variance, and VR is the residual variance. For the estimation of the empirical distribution of  
224 heritability indices, a bootstrap method within the R breedR package was used for 1000  
225 simulations per condition. We used the online tool specifically designed for the DGRPs  
226 (<http://dgrp2.gnets.ncsu.edu/>)(Huang et al., 2014; Mackay et al., 2012) for GWAS. The  
227 Manhattan and QQ-plots were generated using R. Raw GWAS data can be accessed at  
228 <https://data.mendeley.com/datasets/5m9ghb7vbs/4>

229

### 230 •Single larva transcriptome analysis

231 *RNA extraction from single larvae:* Larvae were handpicked under the microscope using forceps  
232 and transferred to Eppendorf tubes filled with 100uL of beads and 350 uL of Trizol. The samples  
233 were then homogenized using a Precellys 24 Tissue Homogenizer at 6000 rpm for 30 seconds.  
234 After homogenization, the samples were transferred to liquid nitrogen for flash freezing and stored  
235 at -80°C. For RNA extraction, samples were thawed on ice, 350 uL of 100% Ethanol was then  
236 added to each sample before homogenizing again with the same parameters. Direct-zol™ RNA  
237 Miniprep R2056 Kit was used to extract RNA with these modifications: DNase I treatment was  
238 skipped; after the RNA Wash step, an extra 2 min centrifugation step was added to remove  
239 residual wash buffer. Lastly, the sample was eluted in 10 uL of water, incubated at room

240 temperature for 2 min and then spun for 2 min to collect RNA. RNA was transferred to a low-  
241 binding 96 well plate and stored at -70°C.

242

243 *RNA-sequencing:* We prepared the libraries using the BRB-seq protocol and sequenced them  
244 using an Illumina NextSeq 500 (Alpern et al., 2018). Reads from the BRB-seq protocol generates  
245 two fastq files: R1 containing barcodes and UMIs and R2 containing the read sequences. R2 fastq  
246 file was first trimmed for removing BRB-seq-specific adapter and polyA sequences using the BRB-  
247 seqTools v1.0 suite (available at <http://github.com/DeplanckeLab/BRB-seqTools>). We then  
248 aligned the trimmed reads to the Ensembl r78 gene annotation of the dm3 genome mixed with  
249 *the Lactobacillus Plantarum WJL* genome using STAR (Version 2.5.3a)(Dobin et al., 2013), with  
250 default parameters (and extra "--outFilterMultimapNmax 1" parameter for completely removing  
251 multiple mapped reads). Then, using the BRB-seqTools v1.0 suite (available at  
252 <http://github.com/DeplanckeLab/BRB-seqTools>), we performed simultaneously the sample  
253 demultiplexing, and the count of reads per gene from the R1 FASTQ and the aligned R2 BAM  
254 files. This generated the count matrix that was used for further analyses. Genes were retained in  
255 the analysis if they had more than 10 reads in more than 50 samples. The data was subsequently  
256 transformed using the voom method. Differential expression was performed using the R Limma  
257 package(Law et al., 2014; Ritchie et al., 2015). Genes with a log<sub>2</sub> fold change greater than 2 and a  
258 Benjamini-Hochberg adjusted P-value less than 0.05 were considered differentially expressed.  
259 Since the library preparation was performed in two plates, hence introducing a batch effect, we  
260 used the duplicateCorrelation function and included the batch as a blocking variable. Prior to PCA  
261 analysis and standard deviation calculations, we removed the batch effect using the  
262 removeBatchEffects function and then used the princomp function. We used the cluster profiler  
263 package to perform GSEA analyses. The gmt file containing the gene ontology annotations was  
264 obtained from GO2MSIG data. Specifically, we used the highquality GO annotations for  
265 *Drosophila melanogaster*. For each GSEA analysis, we used 100,000 permutations to obtain  
266 adjusted p-values and only included gene set sizes to between 6 and 1000 genes. The raw  
267 expression data has been deposited in ArrayExpress (accession number: E-MTAB-6518)

268

269 *RNA-sequencing:* We prepared the libraries using the BRB-seq protocol and sequenced them  
270 using an Illumina NextSeq 500(Alpern et al., 2018). Reads from the BRB-seq protocol generates  
271 two fastq files: R1 containing barcodes and UMIs and R2 containing the read sequences. R2 fastq  
272 file was first trimmed for removing BRB-seq-specific adapter and polyA sequences using the BRB-  
273 seqTools v1.0 suite (available at <http://github.com/DeplanckeLab/BRB-seqTools>). We then  
274 aligned the trimmed reads to the Ensembl r78 gene annotation of the dm3 genome mixed with  
275 *the Lactobacillus Plantarum WJL* genome using STAR (Version 2.5.3a)(Dobin et al., 2013), with  
276 default parameters (and extra "--outFilterMultimapNmax 1" parameter for completely removing  
277 multiple mapped reads). Then, using the BRB-seqTools v1.0 suite (available at  
278 <http://github.com/DeplanckeLab/BRB-seqTools>), we performed simultaneously the sample  
279 demultiplexing, and the count of reads per gene from the R1 FASTQ and the aligned R2 BAM  
280 files. This generated the count matrix that was used for further analyses. The data was  
281 subsequently transformed using the voom method and analyzed using the R Limma package(Law  
282 et al., 2014; Ritchie et al., 2015).

283

284 The raw expression data of BRB-Seq has been deposited in ArrayExpress (accession number: E-  
285 MTAB-6518)

286

#### 287 •The making and maintenance of germ-free flies

288 Axenic flies were generated by dechorionating embryos with 50% household bleach for five  
289 minutes; eggs were then washed in successive 70% ethanol and sterile distilled water for three  
290 minutes each. After washing, eggs were transferred to tubes containing standard diet and a

291 cocktail of antibiotics containing 50µg/mL ampicillin, 50µg/mL kanamycin, 15µg/mL  
292 erythromycin, 50µg/mL tetracyclin for stock maintenance. Axeny was routinely verified by  
293 plating larvae and adult lysates on LB and MRS plates. For experiments food without antibiotics  
294 was used.

295

#### 296 •Media preparation and NAC treatment

297 Standard laboratory fly food consists of 50g/L inactivated yeast (Springaline™), 80g/L cornmeal,  
298 7.14g/L agar, 5.12g/L Moldex (Sigma M-50109) and 0.4% propionic acid. Where applicable,  
299 experiments comparing variations in larval size, developmental timing, adult emergence were  
300 performed on diet with 6g or 8g inactivated yeast per liter of media while keeping the same  
301 concentrations for the other ingredients. Where appropriate, 1.7g/L of N-Acetylcystein  
302 (SigmaA7250-25g) was added to the low-protein diet.

303

#### 304 •Larval Length Measurement

305 All live *Drosophila* larvae were collected from each nutritive cap containing low yeast diet by  
306 temporary immersion in sterile PBS, transferred on a microscopy slide, killed with a short pulse of  
307 heat (5 sec at 90°C), mounted with 80% glycerol/PBS. The images were taken with the Leica  
308 stereomicroscope M205FA and the lengths of individual larvae were measured using ImageJ  
309 software(Schneider et al., 2012). For each DGRP strain and each cross and/or condition, at least  
310 three biological replicates were generated.

311

#### 312 •Developmental timing and Adult emergence

313 Developmental timing and adult emergence of the flies were quantified by counting the number  
314 of individuals appearing every 24 hours until the last pupa/adult emerges. Each animal is  
315 assigned to the number that corresponds to the day it appeared, and the population mean and  
316 variance were calculated based on the cumulative numbers.

317

#### 318 •Adult trait measurements

319 2-3 days old adult flies were anesthetized with CO<sub>2</sub> and immersed in 70% ethanol, and individual  
320 body and its corresponding organ (wing and eye) were imaged under a Leica M205  
321 stereomicroscope. Specifically, the adult body length was measured from the top of the head to  
322 the tip of the abdomen. The eye area was measured by manually tracing the circumference of  
323 both eyes. The wings were gently nipped at the base of the hinge and imaged, and the area was  
324 measured by tracing the edge of the wing. All images were taken measured using ImageJ  
325 software

326

#### 327 •Bacteria culture and mono-association

328 For each mono-association experiment, *Lp<sup>WJL</sup>* (Ryu et al., 2008) was grown in Man, Rogosa and  
329 Sharpe (MRS) medium (Difco, ref. #288110) over-night at 37°C, and diluted to O.D.=0.5 the next  
330 morning to inoculate 40 freshly laid eggs on a 55mm petri dish or standard 28mm tubes  
331 containing fly food of low yeast content. The inoculum corresponds to about 5x10<sup>7</sup> CFUs. Equal  
332 volume of sterile PBS was spread on control axenic eggs.

333 To contaminate the garden-collected flies with their own microbiota, eggs were dechorionated  
334 and directly seeded onto appropriate food caps. Sterile PBS was used to wash the side of the  
335 bottles where the adult wild flies were raised to recover more fecal content, and 300 ul of the  
336 wash was inoculated to the dechorionated eggs. For GF control, 300 ul of sterile PBS was used  
337 to inoculate the dechorionated eggs. The microbial composition of this community can be  
338 founded here(Tefit et al., 2017).

339

#### 340 •Bacteria niche load



341 Five to six 24 hour old germ-free larvae were collected from the low-protein diet food cap and  
342 transferred to a microtube containing 400ul of low-protein diet, and inoculated with 50ul of *Lp<sup>WJL</sup>*  
343 of 0.5 O.D.. On the day of harvest, ~0.75-1mm glass micro-beads and 900ul PBS were added to  
344 each microtube and the entire content of the tube was homogenized with the Precellys-24 tissue  
345 homogenizer (Bertin Technologies). Lysate dilutions (in PBS) are plated on MRS agar with  
346 Easyspiral automatic plater (Intersciences). The MRS agar plates were incubated for 24h at 37°C.  
347 The CFU/ml count was calculated based on the readings by the automatic colony counter  
348 Scan1200 (Intersciences)  
349

350 **•Statistical Analysis and data representation**

351 GraphPad Prism software version 6.0f for Macintosh (GraphPad Software, La Jolla California USA,  
352 www.graphpad.com) was used to compare GF and *Lp<sup>WJL</sup>*-associated conditions for larval length,  
353 developmental timing, adult emergence, allometry and linear regression analysis for the  
354 buffering effect. For small samples with less than 10 data points, nonparametric analysis was  
355 conducted. For all each sample set, we first conducted D'agostino-Pearson normality test. If the  
356 samples assume normal distribution, the F test of equality of variances were conducted to  
357 compare variability among the datasets. For samples assuming non-normal distribution, Levene's  
358 test is conducted based on the deviation from the median of each dataset.  
359  
360  
361  
362  
363  
364  
365  
366  
367  
368  
369  
370  
371  
372  
373  
374  
375  
376  
377  
378  
379  
380  
381  
382  
383  
384  
385  
386  
387  
388  
389  
390  
391

392 **Supplemental Reference**

393

394 Alpern, D., Gardeux, V., Russeil, J., and Deplancke, B. (2018). Time- and cost-efficient high-  
395 throughput transcriptomics enabled by Bulk RNA Barcoding and sequencing. *bioRxiv*.

396 Bates, D., Mächler M, Bolker B, Walker S (2015). Fitting Linear Mixed-Effects Models Using lme4.  
397 *Journal of Statistical Software* 67, 1-48.

398 Dobin, A., Davis, C.A., Schlesinger, F., Drenkow, J., Zaleski, C., Jha, S., Batut, P., Chaisson, M.,  
399 and Gingeras, T.R. (2013). STAR: ultrafast universal RNA-seq aligner. *Bioinformatics* 29, 15-21.

400 Hu, Y., Comjean, A., Perkins, L.A., Perrimon, N., and Mohr, S.E. (2015). GLAD: an Online  
401 Database of Gene List Annotation for Drosophila. *J Genomics* 3, 75-81.

402 Huang, W., Massouras, A., Inoue, Y., Peiffer, J., Ramia, M., Tarone, A.M., Turlapati, L., Zichner,  
403 T., Zhu, D., Lyman, R.F., et al. (2014). Natural variation in genome architecture among 205  
404 *Drosophila melanogaster* Genetic Reference Panel lines. *Genome Res* 24, 1193-1208.

405 Law, C.W., Chen, Y., Shi, W., and Smyth, G.K. (2014). voom: Precision weights unlock linear  
406 model analysis tools for RNA-seq read counts. *Genome Biol* 15, R29.

407 Mackay, T.F., Richards, S., Stone, E.A., Barbadilla, A., Ayroles, J.F., Zhu, D., Casillas, S., Han, Y.,  
408 Magwire, M.M., Cridland, J.M., et al. (2012). The *Drosophila melanogaster* Genetic Reference  
409 Panel. *Nature* 482, 173-178.

410 McFall-Ngai, M., Hadfield, M.G., Bosch, T.C., Carey, H.V., Domazet-Lošo, T., Douglas, A.E.,  
411 Dubilier, N., Eberl, G., Fukami, T., Gilbert, S.F., et al. (2013). Animals in a bacterial world, a new  
412 imperative for the life sciences. *Proc Natl Acad Sci U S A* 110, 3229-3236.

413 Powell, J.A. (2014). GO2MSIG, an automated GO based multi-species gene set generator for  
414 gene set enrichment analysis. *BMC Bioinformatics* 15, 146.

415 Ritchie, M.E., Phipson, B., Wu, D., Hu, Y., Law, C.W., Shi, W., and Smyth, G.K. (2015). limma  
416 powers differential expression analyses for RNA-sequencing and microarray studies. *Nucleic  
417 Acids Res* 43, e47.

418 Ryu, J.H., Kim, S.H., Lee, H.Y., Bai, J.Y., Nam, Y.D., Bae, J.W., Lee, D.G., Shin, S.C., Ha, E.M.,  
419 and Lee, W.J. (2008). Innate immune homeostasis by the homeobox gene *caudal* and  
420 commensal-gut mutualism in *Drosophila*. *Science* 319, 777-782.

421 Schneider, C.A., Rasband, W.S., and Eliceiri, K.W. (2012). NIH Image to ImageJ: 25 years of  
422 image analysis. *Nat Methods* 9, 671-675.

423 Tefit, M.A., Gillet, B., Joncour, P., Hughes, S., and Leulier, F. (2017). Stable association of a  
424 *Drosophila*-derived microbiota with its animal partner and the nutritional environment  
425 throughout a fly population's life cycle. *J Insect Physiol*.

426
